# Supplementary material
Source: PubMed Central journal article supplement (PMC7082165)
Supplement: 10-1055-s-0039-1679889-s180102.pdf [file 10-1055-s-0039-1679889-s180102.pdf]

**Supplementary Table S1** Psychotropic drugs to identify patients with MHDs

| Class                                                  | Name of medication           |
|--------------------------------------------------------|------------------------------|
| Tricyclic antidepressants                              | Amitriptyline                |
|                                                        | Amoxapine                    |
|                                                        | Clomipramine                 |
|                                                        | Doxepin                      |
|                                                        | Imipramine                   |
|                                                        | Maprotiline                  |
|                                                        | Nortriptyline                |
|                                                        | Protriptyline                |
|                                                        | Trimipramine                 |
|                                                        | Monoamine oxidase inhibitors |
| Phenelzine                                             |                              |
| Selegiline                                             |                              |
| Tranylcypromine                                        |                              |
| Selective serotonin reuptake inhibitors                | Citalopram                   |
|                                                        | Escitalopram                 |
|                                                        | Fluoxetine                   |
|                                                        | Fluvoxamine                  |
|                                                        | Paroxetine                   |
|                                                        | Sertraline                   |
| Selective serotonin-norepinephrine reuptake inhibitors | Desvenlafaxine               |
|                                                        | Duloxetine                   |
|                                                        | Milnacipran                  |
|                                                        | Venlafaxine                  |
| Other antidepressants                                  | Bupropion                    |
|                                                        | Mirtazapine                  |
|                                                        | Trazodone                    |

(Continued)

**Supplementary Table S1** (Continued)

| Class             | Name of medication |
|-------------------|--------------------|
| Benzodiazepines   | Alprazolam         |
|                   | Bromazepam         |
|                   | Chlordiazepoxide   |
|                   | Clobazam           |
|                   | Clonazepam         |
|                   | Clorazepate        |
|                   | Clotiazepam        |
|                   | Cloxazolam         |
|                   | Delorazepam        |
|                   | Diazepam           |
|                   | Etizolam           |
|                   | Halazepam          |
|                   | Ketazolam          |
|                   | Lorazepam          |
|                   | Medazepam          |
|                   | Nordazepam         |
|                   | Oxazepam           |
|                   | Phenazepam         |
|                   | Pinazepam          |
| Prazepam          |                    |
| Premazepam        |                    |
| Other anxiolytics | Bretazenil         |
|                   | Buspirone          |

Abbreviation: MHDs, mental health disorders.
